# Supplementary material for: Self-modification of TiO2 one-dimensional nano-materials by Ti3+ and oxygen vacancy using Ti2O3 as precursor
Source: Royal Society of Chemistry journal article supplement (doi:10.1039/c5ra07079a), 2015-01-01
Supplement: c5ra07079a1.pdf [file c5ra07079a1.pdf]

Electronic Supplementary information

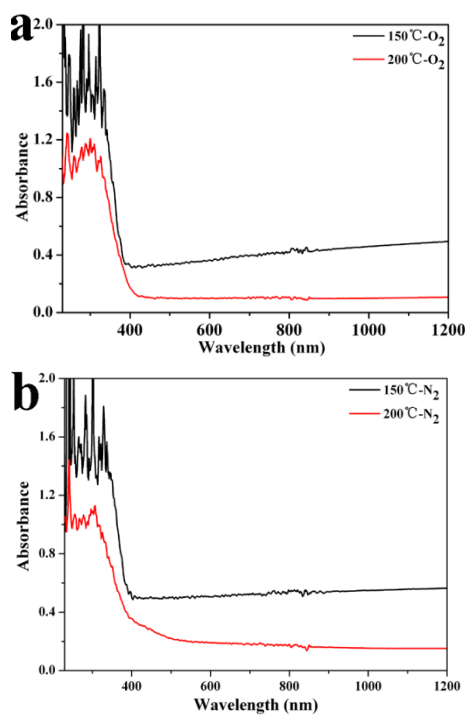

Figure S1 UV-vis diffuse reflection spectra of TiO<sub>2-x</sub> nanowires (150 °C) and nanobelts (200 °C) calcinated in air (a) and in nitrogen (b)
